# Supplementary material for: LWD–TCP complex activates the morning gene CCA1 in Arabidopsis
Source: PubMed Central journal article supplement (PMC5065627; doi:10.1038/ncomms13181), 2016-10-13
Supplement: ncomms13181-s1.pdf [file ncomms13181-s1.pdf]

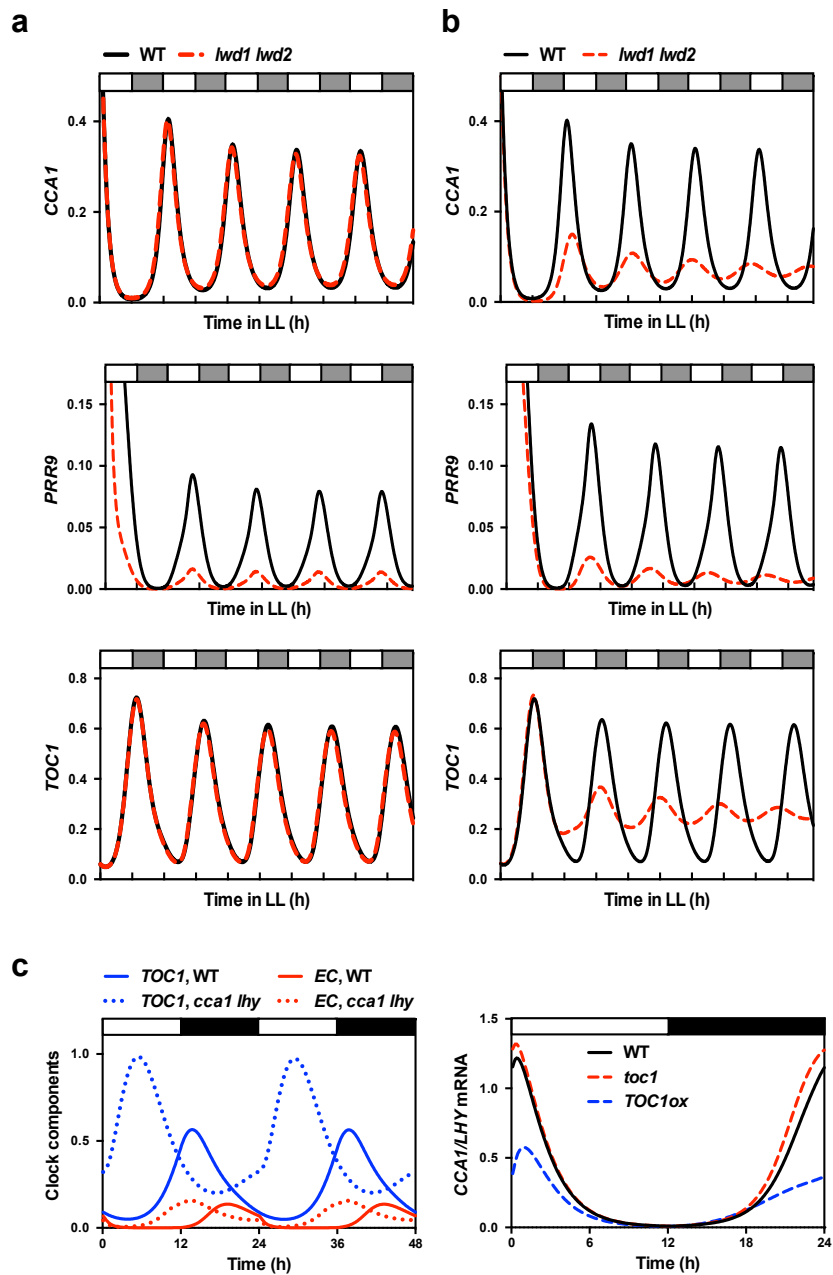

**Supplementary Fig. 1. The integration of LIGHT-REGULATED WD1 (LWD1) sustained the robust performance of the Pokhilko model**

The Pokhilko model was revised to incorporate LWD1 as an activator for *PRR9* only (a) or both *PRR9* and *CCA1* (b). The mRNA expression profiles of *CCA1*, *PRR9* and *TOC1* in both the wild type (WT) and *lwd1 lwd2* mutant under constant light are shown. (c) Genetic perturbation tests were simulated in *cca1 lhy*, *toc1* and *TOC1ox* for the expression of *TOC1*, *EVENING COMPLEX (EC)* and *CCA1/LHY* with the revised Pokhilko model implementing LWD1 in this study.

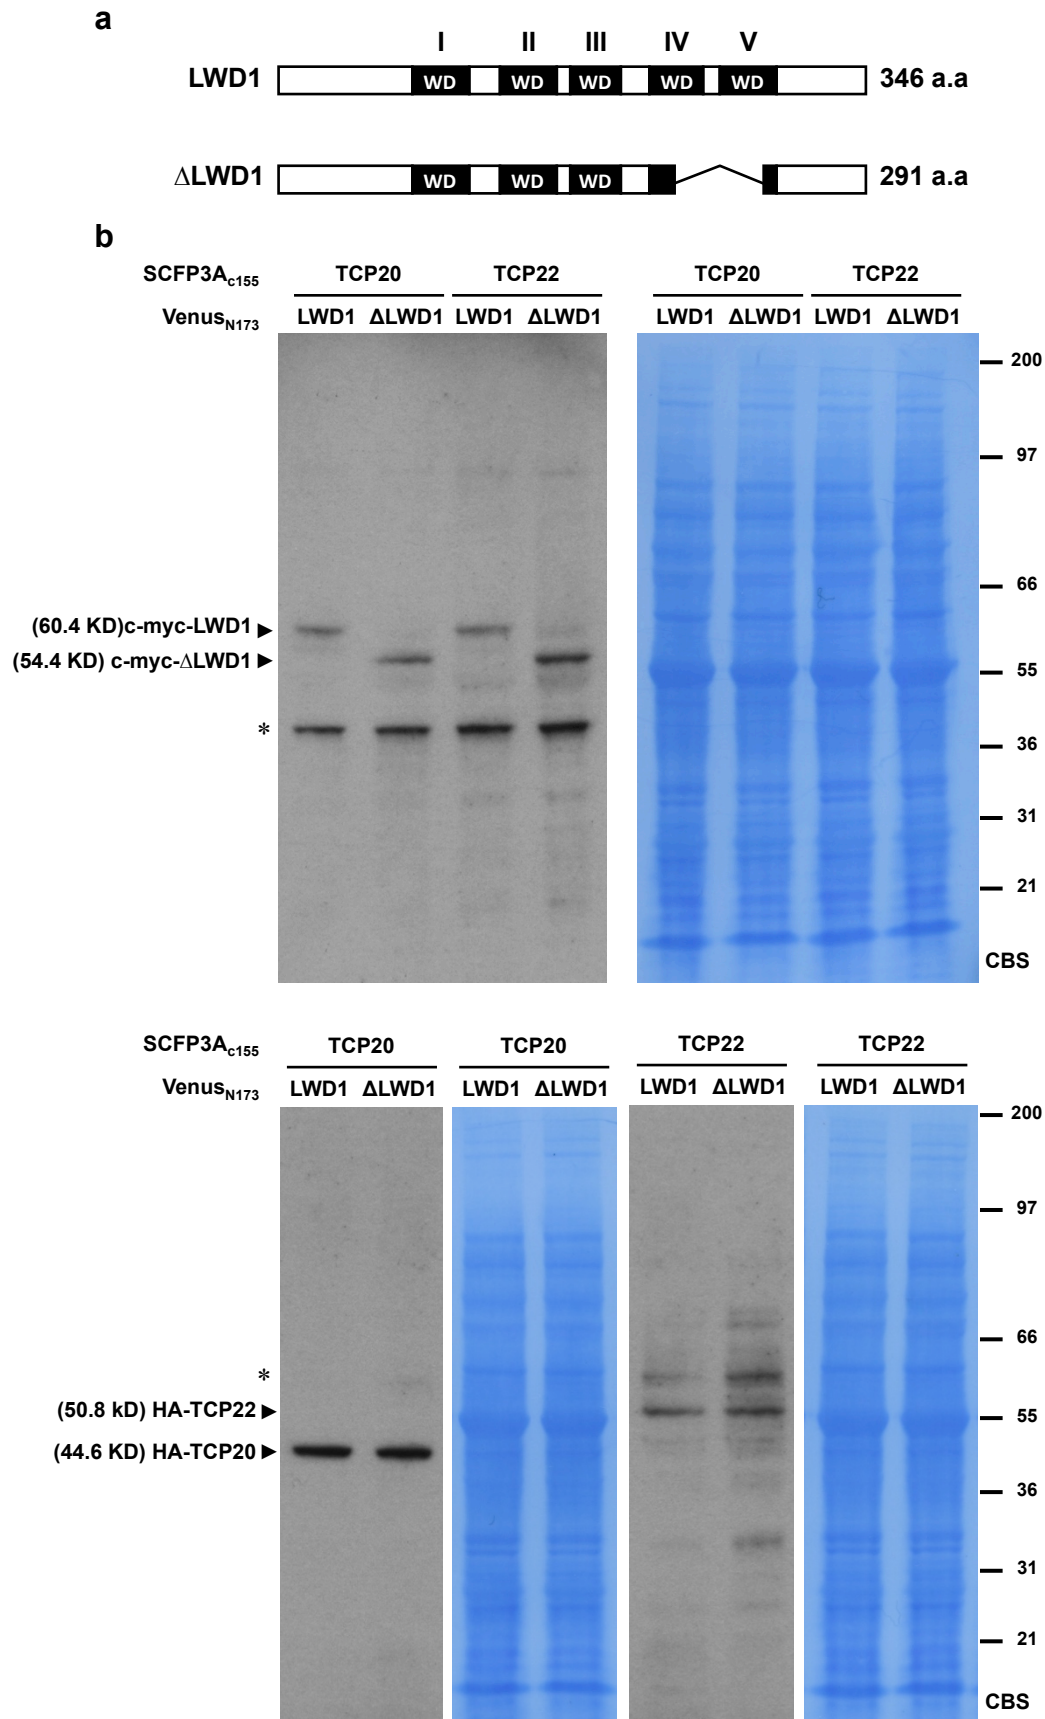

**Supplementary Fig. 2. Protein expression of LWD1/ΔLWD1 and TCP20/TCP22 by bimolecular fluorescence complementation (BiFC) assay**

(a) Construct diagrams of full-length LWD1 and truncated LWD1 (ΔLWD1) used for transient expression in *Arabidopsis* seedlings. The WD repeat motifs I to V are in black boxes. (b) Protein lysates were prepared from seedlings co-cultured with *Agrobacterium* harboring four BiFC combinations. Immunoblotting involved use of anti-LWD1 and anti-HA antisera to detect c-myc-LWD1 and HA-TCP20/22, respectively. Asterisks indicate the non-specific bands. Coomassie blue-stained (CBS) membranes are shown for equal protein loading.

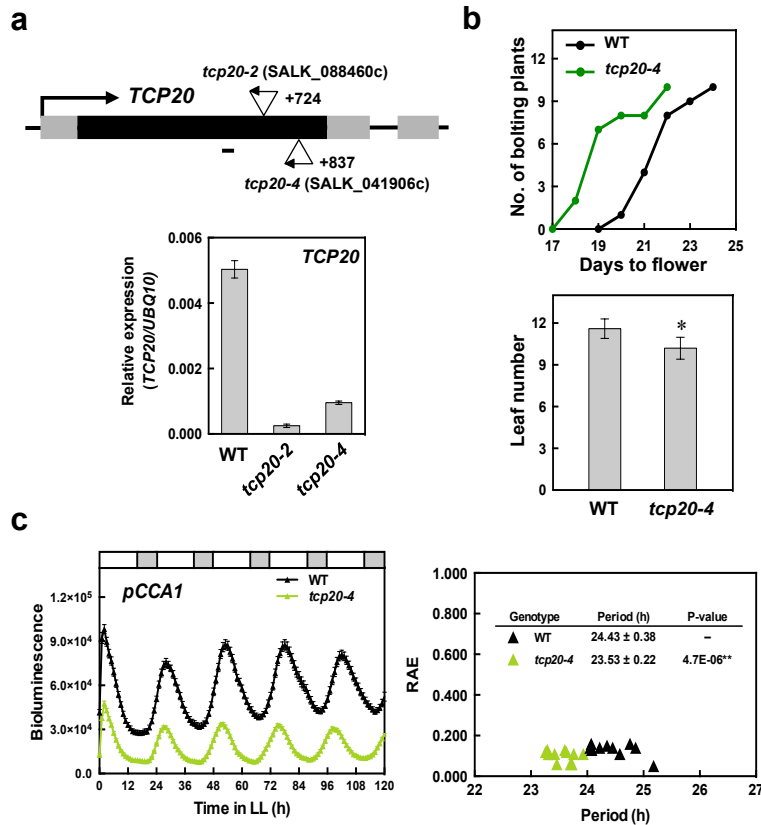

### Supplementary Fig. 3. Molecular characterization of *tcp20* mutants

(a) Schematic representation of *tcp20* T-DNA insertion lines. The insertion sites (relative to the translation start +1) were sequence-validated. qRT-PCR of *TCP20* mRNA levels in the WT and *tcp20-2* and *tcp20-4* mutants normalized to *UBQ10* expression ( $TCP20/UBQ10$ ). Black horizontal line indicates the region amplified on qRT-PCR. (b) Early flowering of *tcp20-4* mutant under long-day conditions. Data are mean ± SD (n ≥ 10). Asterisk indicates that mutant plants flowered significantly earlier than WT plants (Student's t test; \*P<0.01). Ten to 12 plants for each genotype were planted for scoring for each biological replicate. Similar results were observed in three independent experiments. (c) *pCCA1::LUC2* level in *tcp20-4* mutant. Reduced period length in *tcp20-4* mutant (n ≥ 11 seedlings per genotype). Similar results were observed in three independent experiments and one representative result was shown. Data are mean ± SE. Period length and relative amplitude error (RAE) were calculated by FFT-NLLS analysis according to data from LL48 to LL120. Asterisks indicate that period lengths were significantly shortened in *tcp20-4* (Student's t test; \*\*P<0.001).

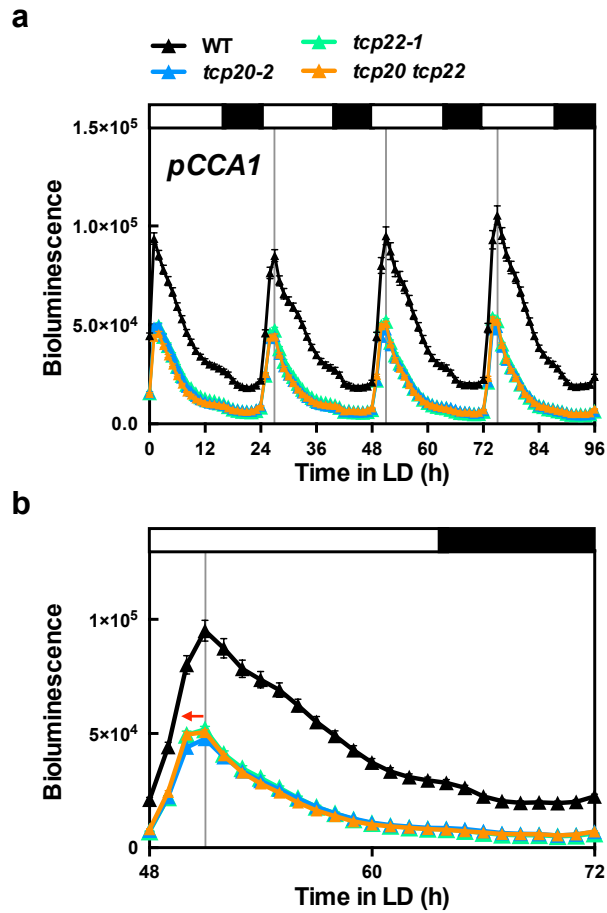

**Supplementary Fig. 4. Reduced and phase-advanced expression of *pCCA1::LUC2* in *tcp* mutants under entrainment conditions**

(a) Reduced expression amplitudes of *pCCA1::LUC2* in *tcp20-2*, *tcp22-1* and *tcp20 tcp22* mutants under 16h-light/8h-dark conditions. (b) Advanced expression (arrow) of *pCCA1::LUC2* in the *tcp* mutants in a representative 24-h cycle (48-72 h). Vertical line marks the expression peak of *pCCA1::LUC2* in WT plants. Data are mean  $\pm$  SE ( $n \geq 15$  seedlings for each genotype).

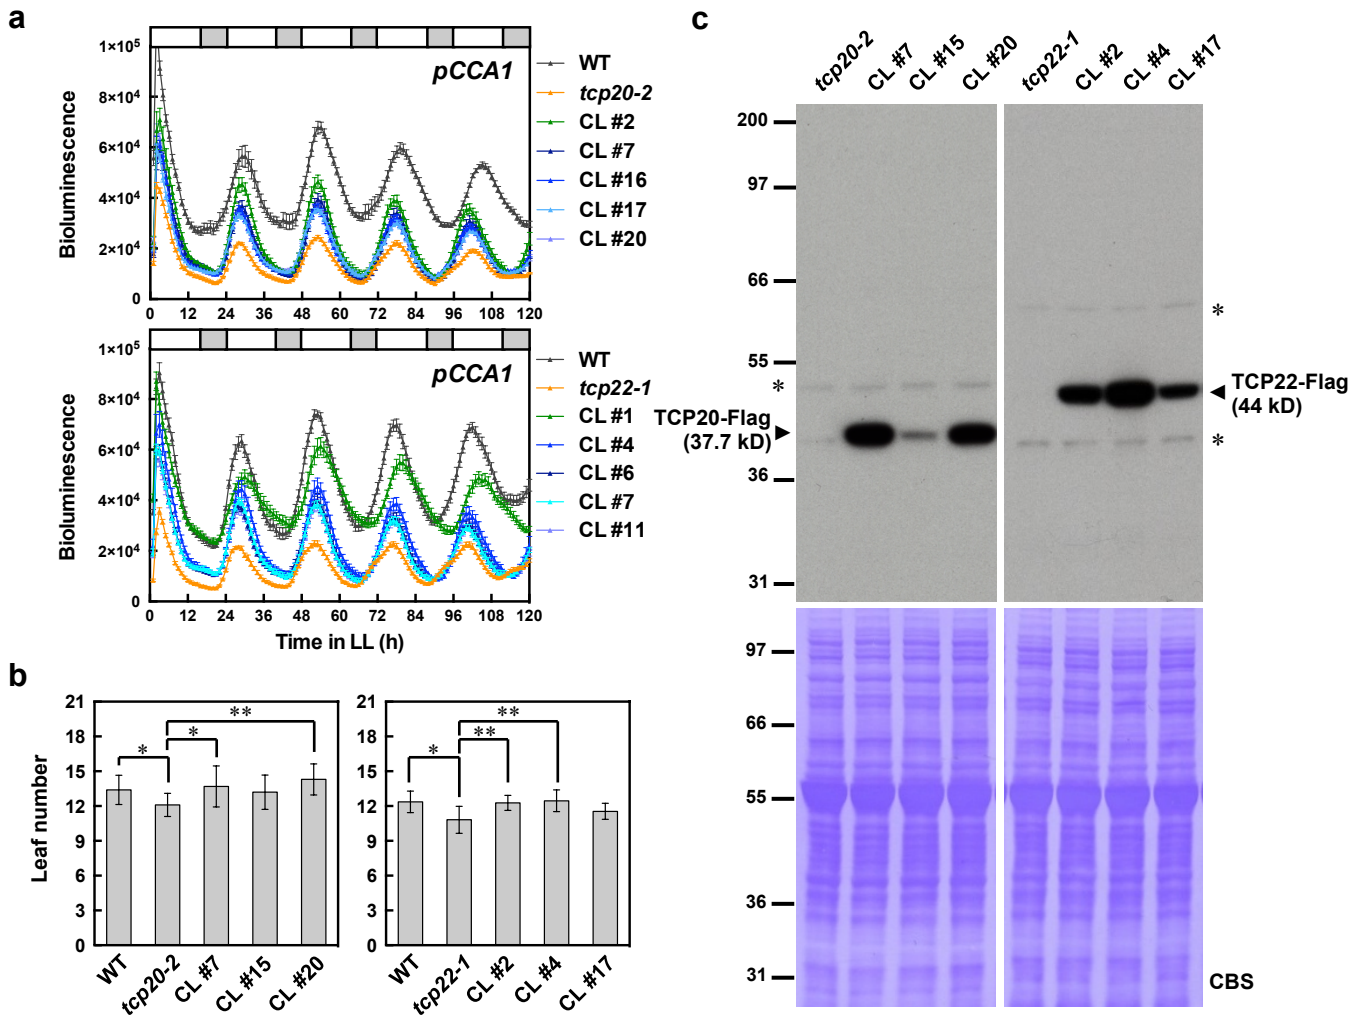

### Supplementary Fig. 5. Functional complementation of *tcp20-2* and *tcp22-1* mutants

(a) The *CCA1* promoter activities in *tcp20-2* and *tcp22-1* mutants were partially complemented by expressing *pTCP20::TCP20-Flag* and *pTCP22::TCP22-Flag*, respectively. Seven-d-old seedlings of *tcp20-2 pTCP20::TCP20-Flag pCCA1::LUC2*, *tcp22-1 pTCP22::TCP22-Flag pCCA1::LUC2* and corresponding reporter line in the WT grown under 16-h light/8-h dark ( $75 \mu\text{mol m}^{-2} \text{s}^{-1}$ ) were transferred to continuous light ( $30\text{-}35 \mu\text{mol m}^{-2} \text{s}^{-1}$ ) at ZT0 and imaged every hour for 5 days. T2 plants from five independent complementation lines (CLs) for each complementation assay were analyzed. Data are mean  $\pm$  SE ( $n = 6\text{-}8$ ). (b) *pTCP20::TCP20-Flag* and *pTCP22::TCP22-Flag* complemented the early flowering phenotype in *tcp20-2* and *tcp22-1* mutants, respectively, under long-day conditions. Data are mean  $\pm$  SD ( $n \geq 10$ ). Asterisks indicate significantly different flowering time between *tcp* mutants and the WT or between *tcp* mutants and CLs (Student's t test; \* $P < 0.05$ , \*\* $P < 0.01$ ). Ten to 12 plants for each genotype were planted for scoring for each biological replicate. Similar results were observed in three independent experiments. (c) Seven-d-old seedlings grown under long-day conditions were collected at ZT10 for immunoblot analyses with anti-Flag antiserum. Asterisks indicate the non-specific bands. Portions of the Coomassie blue-stained (CBS) blot are shown for protein loading control.

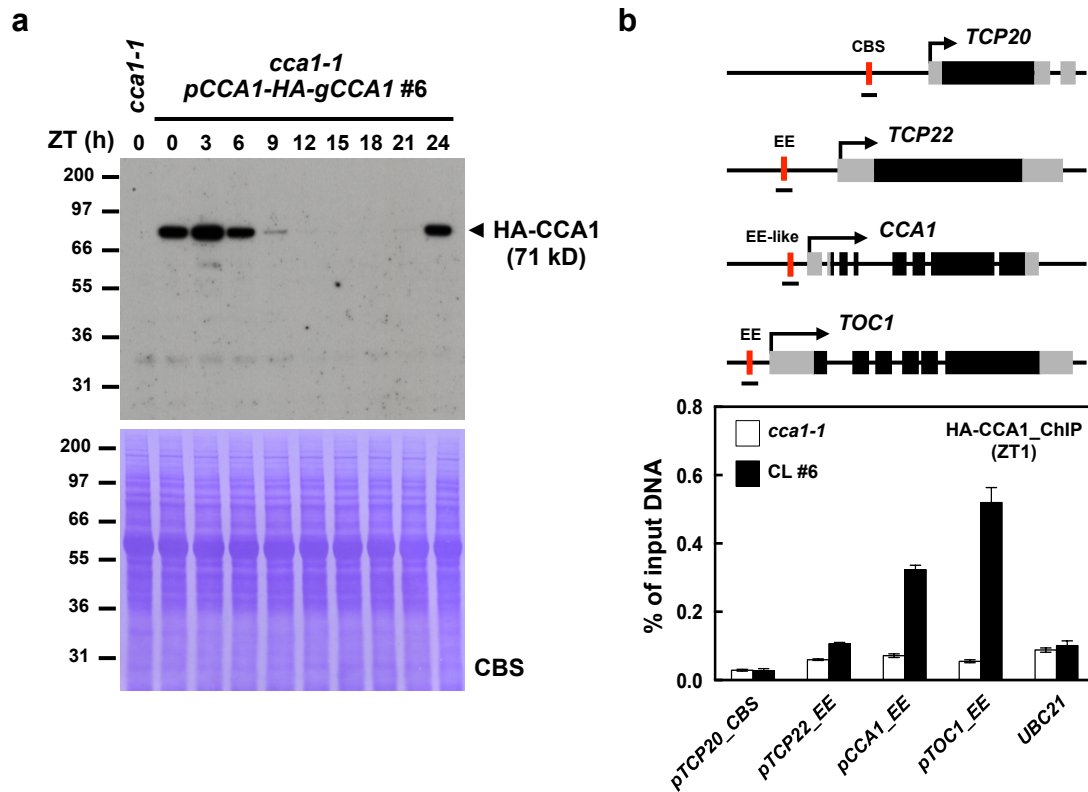

**Supplementary Fig. 6. CCA1 does not bind with CCA1-binding site (CBS) or evening element (EE) in *TCP20* or *TCP22* promoters**

(a) Anti-HA antibody was used to examine the expression of HA-CCA1 driven by the native promoter in the complementation line *cca1-1 pCCA1::HA-gCCA1 #6* (CL #6) under long-day conditions. Three biological replicates showed similar patterns of HA-CCA1 accumulation. (b) ChIP-qPCR assay of the binding of HA-CCA1 to the indicated promoters with anti-HA antibody in *cca1-1* mutant and in CL#6. Red vertical bars are the EE, EE-like and CBS in the promoter regions of the indicated genes. Horizontal bars are amplicons for ChIP-qPCR analyses. Data are mean  $\pm$  SD from one representative experiment (n = 3). Similar results were observed in three independent experiments.

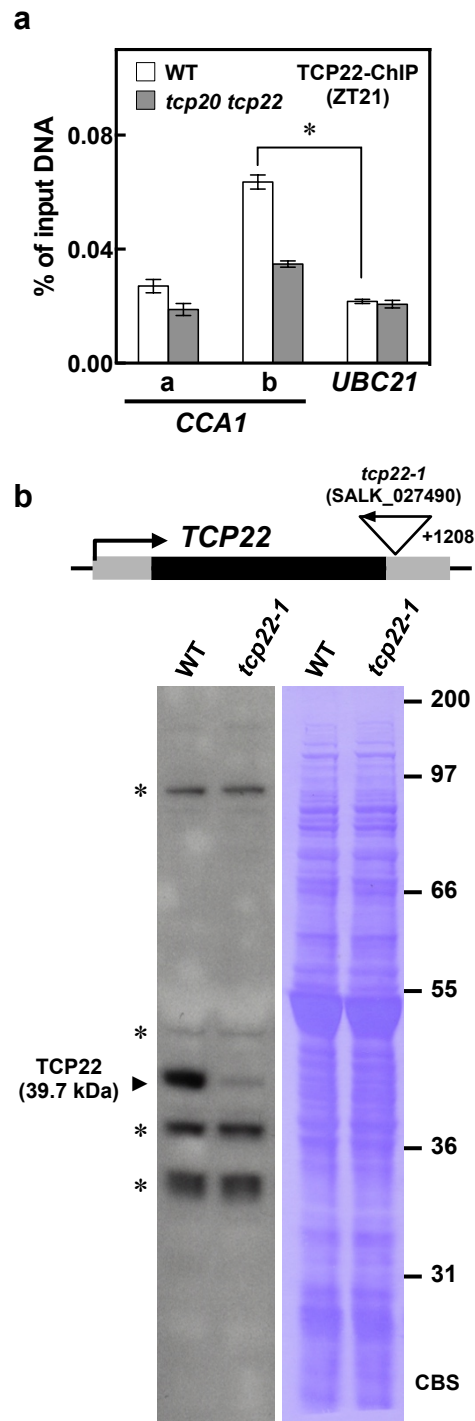

**Supplementary Fig. 7. TCP22 associates with TCP-binding site (TBS)-containing region of *CCA1* promoter *in vivo*.**

(a) TCP22 associates with TBS-containing region of *CCA1* promoter *in vivo*. ChIP assays involved use of anti-TCP22 antisera. Data are mean  $\pm$  SD (n = 3). Asterisk indicates that TCP22 preferentially binds to the amplicon 'b' (Student's t test; \*P<0.0005). Similar results were observed in two independent experiments. (b) Schematic representation of T-DNA insertion in *tcp22-1* used in this study. The insertion site at +1208 (relative to the translation start +1) was sequence-validated. Gray and black boxes indicate the untranslated and coding regions. Rosette leaves of 40-d-old WT and *tcp22-1* grown under 16-h light/8-h dark conditions were collected at ZT4 for immunoblot analyses. Polyclonal antisera against TCP22 raised in rabbit recognized a protein of approximately 40 kDa which is greatly decreased in the *tcp22-1* mutant. Asterisks indicate the non-specific bands. A portion of the Coomassie blue-stained (CBS) blot is shown for protein loading control.

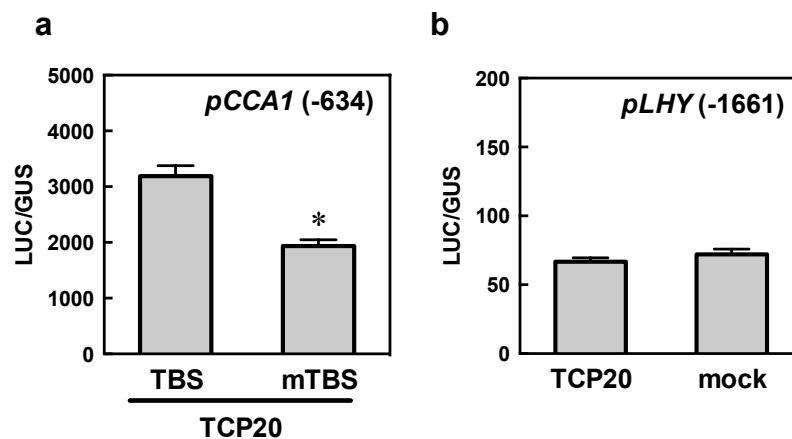

**Supplementary Fig. 8. TCP20 activates *CCA1* promoter but not *LHY***

(a) Bioluminescence analyses of the reporter *LUC2* driven by WT TBS (TBS) or mutated TBS (mTBS) version of *pCCA1* (-634) involved TCP20 as the effector in *Arabidopsis* protoplasts. Asterisk indicates that *pCCA1* activity is significantly reduced when TBS is mutated (Student *t* test; \**P* < 0.001). (b) TCP20 did not activate the expression of *pLHY* (-1661). *LUC2* activity was normalized to *GUS* activity from the transfection control *35S::GUS*. Mock represents an empty effector vector co-transfected with the reporter construct. Data are mean  $\pm$  SD (*n* = 3). Similar results were observed in three independent experiments.





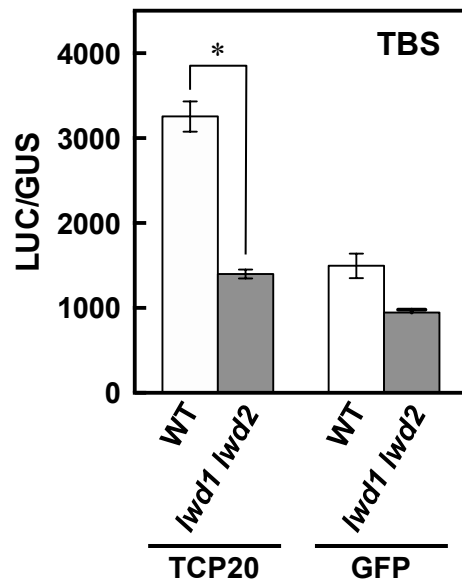

**Supplementary Fig. 10. Functional dependency of TCP20 on LWD1**

(a) TCP20 possessing activator activity for the TBS of *CCA1* promoter in transient assays with protoplasts isolated from WT plants but not *lwd1 lwd2* mutants. Data are mean  $\pm$  SD (n = 3). Asterisk indicates that the TCP20 activator activity toward TBS is significantly increased in WT (Student's t test; \*P<0.005). Similar results were observed in two independent experiments.

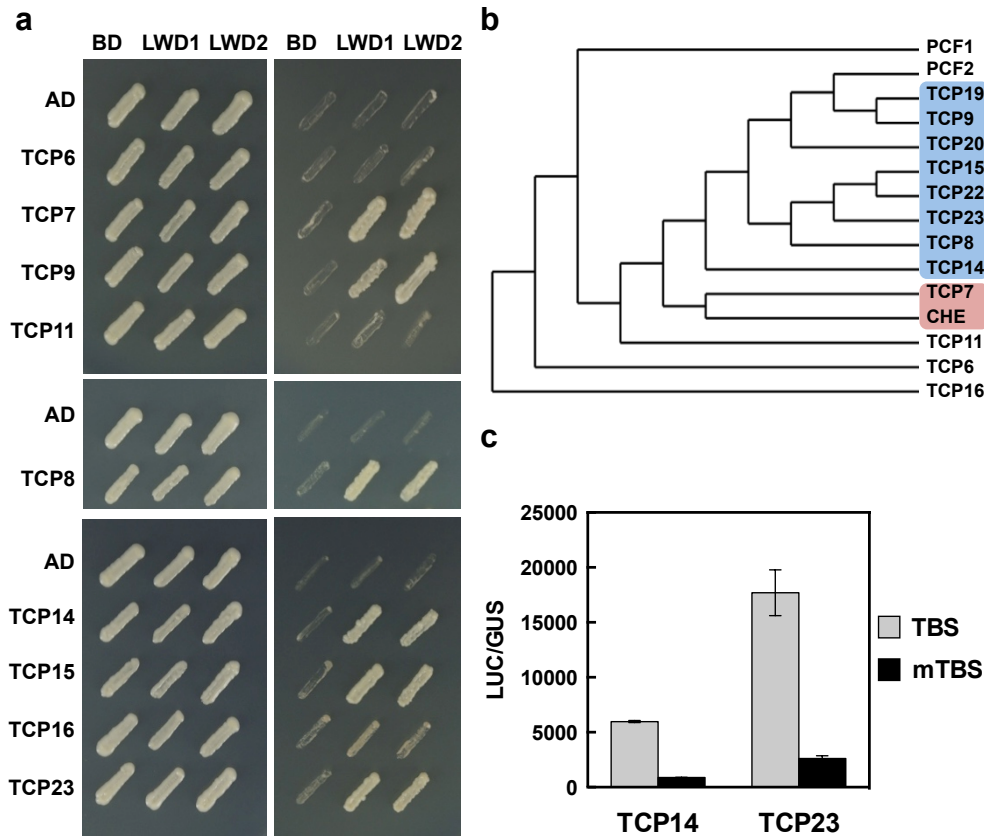

**Supplementary Fig. 11. LWDs interact with additional class I TCP members that are transcriptional activators**

(a) LWD1/LWD2 interact with other class I TCP members on yeast two-hybrid assays. Bait and prey constructs selected on the SD-WL and LWD–TCP interaction was assessed on SD-WLH with 3-AT of 0.5 mM for TCP6/TCP7/TCP9/TCP11, 3 mM for TCP8, and 2 mM for TCP14/TCP15/TCP16/TCP23.

(b) Phylogenetic analysis of the relationship among class I TCP members. The clades for LWD-interacting TCP members are in blue or red. CHE is a repressor of *CCA1*. PCF1 and PCF2 are TCP transcription factors from rice.

(c) Transient assay in *Arabidopsis* protoplasts of TCP14 and TCP23 possessing activator activity toward the promoter containing TBS but not mTBS. Data are mean  $\pm$  SD (n = 3). Similar results were observed in three independent experiments.

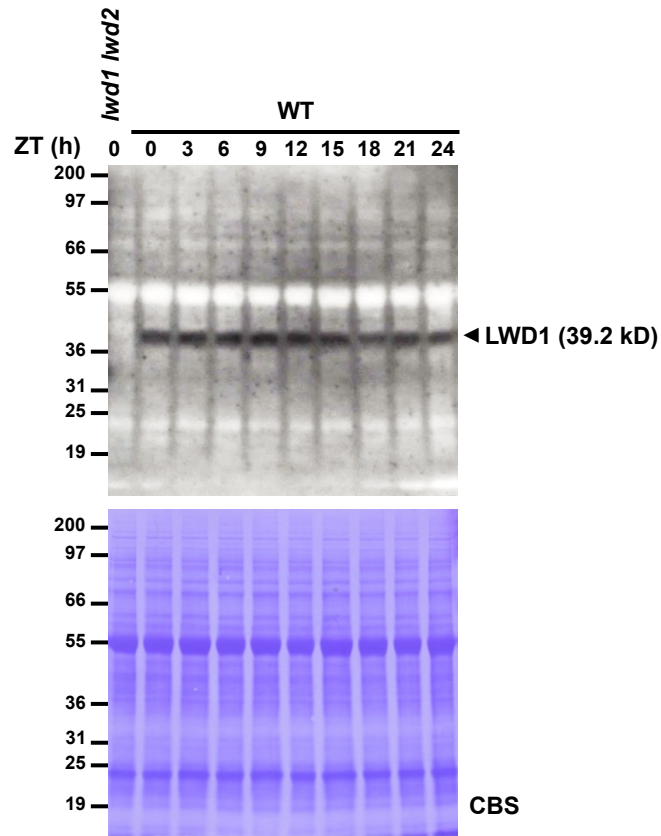

**Supplementary Fig. 12. Accumulation of LWD1 protein in a 24-h cycle**

LWD1 protein level was determined in the WT by using anti-LWD1 antibody. An amount of 30  $\mu$ g total protein prepared from 14-d-old seedlings was loaded for each sample collected at the indicated ZT under the long-day conditions (16-h light/8-h dark). A portion of the Coomassie blue-stained (CBS) blot is shown for protein loading control. Data are representative of three biological replicates with similar patterns of LWD1 accumulation.

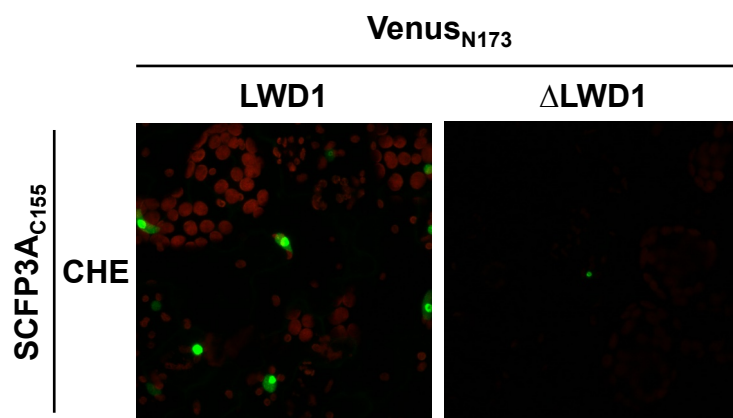

**Supplementary Fig. 13. LWD1 interacts with the *CCA1* repressor CHE**

The BiFC assays were performed using Venus<sub>N173</sub>-fused full-length (LWD1) or truncated ( $\Delta$ LWD1) with SCFP3A<sub>C155</sub>-fused CHE. The fluorescence signal detected in nuclei with the LWD1 and CHE interaction was reduced with the combination of  $\Delta$ LWD1 and CHE.

Supplementary Fig. 14. Results of biological replicates in this study

Biological replicates of Fig. 1b

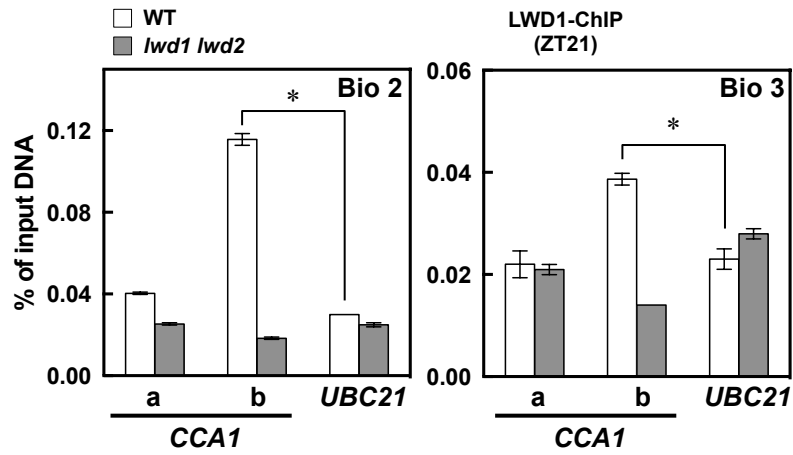

Biological replicate of Fig. 3a

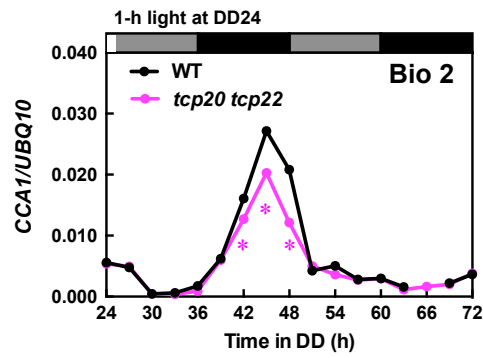

Biological replicates of Fig. 3e

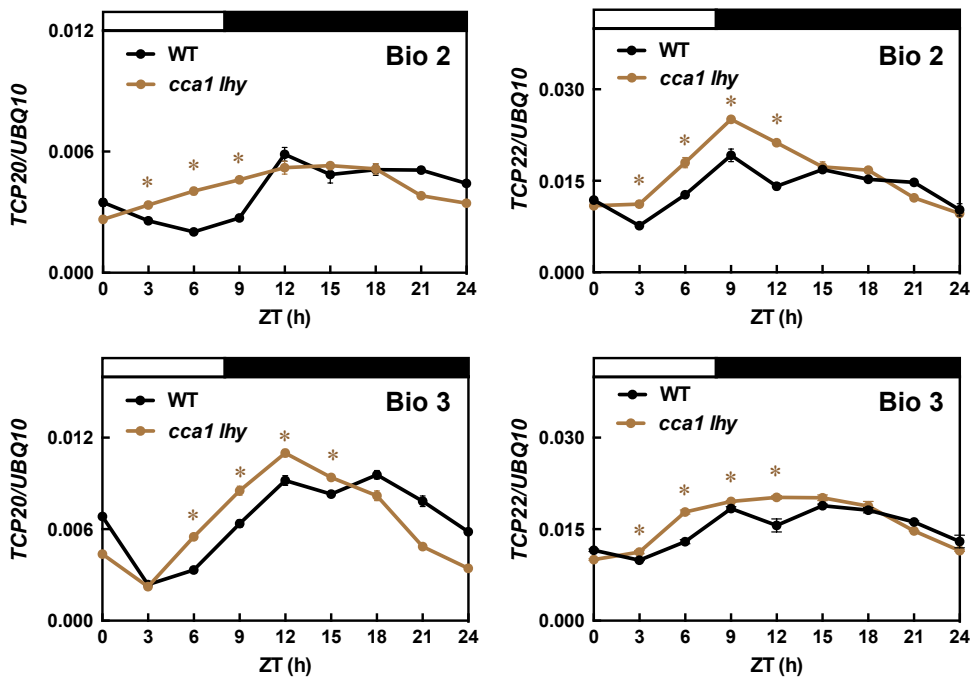

### Biological replicate of Fig. 4a

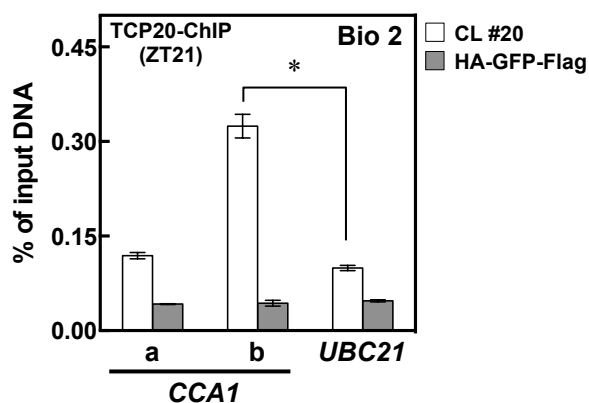

### Biological replicates of Fig. 5c

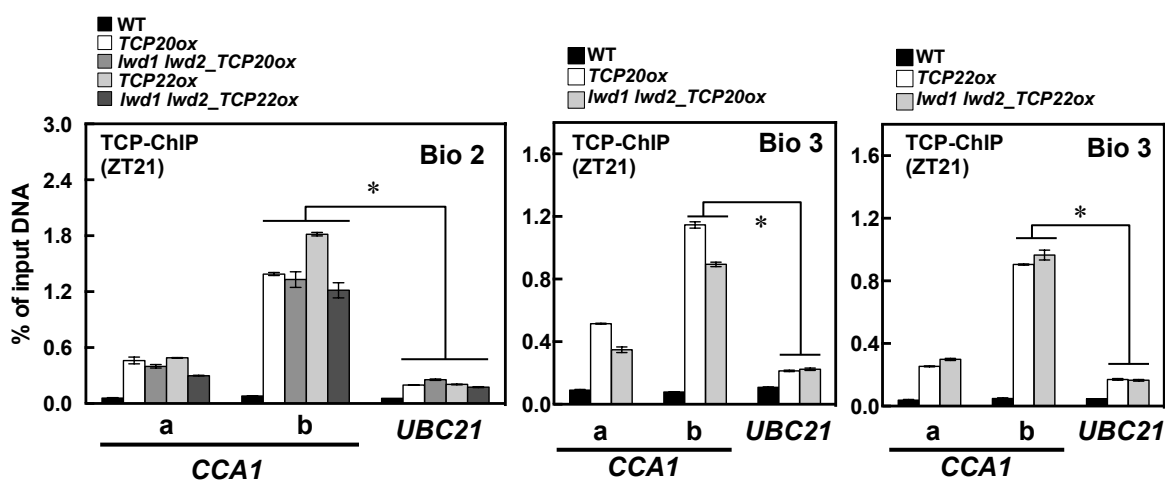

### Biological replicates of Fig. 5d

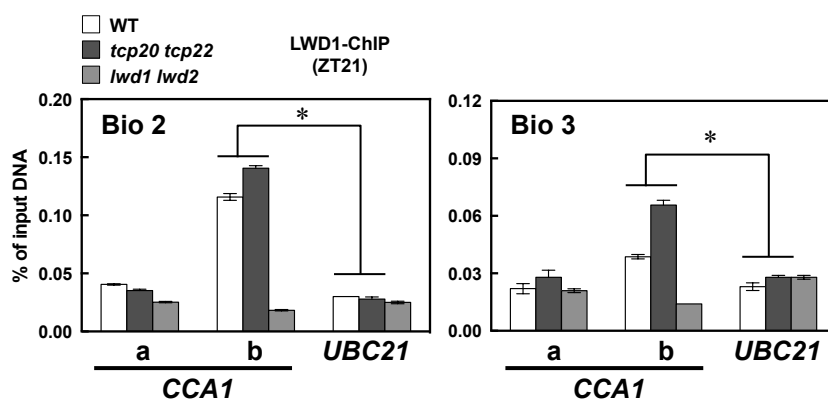

### Supplementary Table 1

LWD1 interacts with TCP family members in yeast two-hybrid assays

| TCP family | LWD1 interaction prey |                  | Positive transformant count |     |     |       |
|------------|-----------------------|------------------|-----------------------------|-----|-----|-------|
|            | AGI No.               | Gene name        | 3-AT (mM)                   |     |     | Total |
|            |                       |                  | 1.0                         | 0.5 | 0.1 |       |
| Class I    | At1g72010             | <i>TCP22</i>     | 92                          | 89  | 58  | 239   |
|            | At3g27010             | <i>TCP20</i>     | 1                           | 1   | 80  | 82    |
|            | At5g51910             | <i>TCP19</i>     | 0                           | 0   | 2   | 2     |
|            | At5g08330             | <i>TCP21/CHE</i> | 0                           | 0   | 1   | 1     |
| Class II   | At1g53230             | <i>TCP3</i>      | 0                           | 0   | 2   | 2     |



## Supplementary Table 2

### Primers and oligos used in this study

| Name                             | Sequence (5' to 3')                |
|----------------------------------|------------------------------------|
| <b>Promoter::LUC2 constructs</b> |                                    |
| pTCP20-PstI-Fw                   | AAACTGCAGAAACGATTCCAATTAGCCTC      |
| pTCP20-Sall-Rev                  | AGGCGTCGACCGAAGCTTGCTTGTGTGG       |
| pTCP22-PstI-Fw                   | ATACTGCAGATGGGTTTAGAAGGAGTCAT      |
| pTCP22-Sall-Rev                  | TGGCGTCGACCTTCAAATCCGTAAAAAGATATG  |
| pCCA1 (-984)-PstI-Fw             | CTCTGCAGGTCTCTGGTCTTTTTTAG         |
| pCCA1 (-634)-PstI-Fw             | TGTCTGCAGGTCCACTGATGTTTCTAGTGT     |
| pCCA1 (-1)-NcoI-Rev              | TCAACCATGGCACTAAGCTCCTCTACACAA     |
| pLHY(-1661)-PstI-Fw              | CTTCTGCAGGATTCGGGTAGTTCAGTTCTT     |
| pLHY(-1)-Sall-Rev                | GATGGTCGACAACAGGACCGGTGCAGCTATT    |
| <b>Yeast two-hybrid</b>          |                                    |
| Sall-T7 promoter-Fw              | ACCTGTCGACCTTTAATACGACTCACTAT      |
| PstI-NotI-Rev                    | GTTAGCGGCCGCACTACGATTCATCTGCAGC    |
| LWD1-XmaI-Fw                     | TACGCCCGGGTATGGGAACGAGCAGCGAT      |
| LWD1-NotI-Rev                    | ATAAGCGGCCGCTCAAACCCTGAGAATTTGCA   |
| LWD2-XmaI-Fw                     | TCAGGCCCGGAATGGTTACGAGCAGCGAT      |
| LWD2-NotI-Rev                    | CTTTGCGGCCGCTCAGACCCGGAGAATCTG     |
| TCP6-NdeI-Fw                     | CAGCATATGGTCATGGAGCCCAAGAAG        |
| TCP6-NotI-Rev                    | TATGCGGCCGCTTATGAACCATTTTCCTCT     |
| TCP7-NdeI-Fw                     | CTTCATATGTCTATTAACAACAACAACA       |
| TCP7-NotI-Rev                    | ATAGCGGCCGCTTAACGTGGATCTTCCTCTC    |
| TCP8-NdeI-Fw                     | CAGCATATGGATCTCTCCGACATCCGA        |
| TCP8-NotI-Rev                    | TATGCGGCCGCTCACTCAGAGCTATTTGAG     |
| TCP9-NdeI-Fw                     | TAACATATGGCGACAATTCAGAAGCTTG       |
| TCP9-NotI-Rev                    | TTAGCGGCCGCTCAGTGGTTCGATGACCGTG    |
| TCP11-NcoI-Fw                    | TAGCCATGGAGATGATTTTTTCAGAATGTGTGCA |
| TCP11-NotI-Rev                   | TATGCGGCCGCTAATGGTGACGGCGTCTA      |
| TCP14-NdeI-Fw                    | CTCCATATGCAAAAGCCAACATCAAG         |

|                |                                  |
|----------------|----------------------------------|
| TCP14-NotI-Rev | TATGCGGCCGCCTAATCTTGCTGATCCTC    |
| TCP15-NdeI-Fw  | CTTCATATGGATCCGGATCCGGATCATA     |
| TCP15-NotI-Rev | TTTGCGGCCGCCTAGGAATGATGACTGGTGC  |
| TCP16-NdeI-Fw  | CAGCATATGGATTCGAAAAATGGAATTA     |
| TCP16-NotI-Rev | TTTGCGGCCGCTCAAACCTGTGGTTGTGGCTG |
| TCP20-NdeI-Fw  | CGCTCATATGGATCCCAAGAACCTAAA      |
| TCP20-XmaI-Rev | TCGCCC GGGTTAACGACCTGAGCCTTG     |
| TCP22-NdeI-Fw  | AGTCCATATGAATCAGAATTCCTCTGT      |
| TCP22-XmaI-Rev | TCCCCCGGGTCACTTTTTGTCATCACC      |
| TCP23-NdeI-Fw  | CTTCATATGGAGTCCCACAACAACAACC     |
| TCP23-NotI-Rev | TTTGCGGCCGCTCAAGGAGAACCATCTAT    |

### **BiFC**

|                     |                               |
|---------------------|-------------------------------|
| CHE-BamHI-Fw        | CGGGATCCATGGCCGACAACGACGGA    |
| CHE-stop-SmaI-Rev   | TCCCCCGGGTCAACGTGGTTCGTGGTCGT |
| LWD1-SpeI-Fw        | GGACTAGTATGGGAACGAGCAGCGAT    |
| LWD1-stop-SmaI-Rev  | TCGCCC GGGTCAAACCCTGAGAATTTG  |
| LWD1-BamHI-Fw       | TACGGATCCTCAAGCTTTGATTTGGGAT  |
| TCP20-SpeI-Fw       | GGACTAGTATGGATCCCAAGAACCTA    |
| TCP20-stop-SmaI-Rev | TCGCCC GGGTTAACGACCTGAGCCTTG  |
| TCP22-SpeI-Fw       | GGACTAGTATGAATCAGAATTCCTCT    |
| TCP22-stop-SmaI-Rev | TCCCCCGGGTCACTTTTTGTCATCACC   |

### **EMSA**

|                       |                                |
|-----------------------|--------------------------------|
| TCP-binding-Fw        | GAGATTAACGATCTTAAGTAGGTCCCCTA  |
| TCP-binding-Rev       | TTCGTTATAATATCTTGATCTAGTGGGACC |
| TCP-binding-Fw (mut)  | GAGATTAACGATCTTAAGTATTGAAACATA |
| TCP-binding-Rev (mut) | TTCGTTATAATATCTTGATCTATGTTTCAA |

### **ChIP-qPCR**

|             |                             |
|-------------|-----------------------------|
| pCCA1-a-Fw  | TGTCAAAGTGTTGTAAATTCCTCAAGA |
| pCCA1-a-Rev | GCATGAAGGGTAGAAGACTAAATGG   |

|                |                           |
|----------------|---------------------------|
| pCCA1-b-Fw     | TCGACAAACTGGTGGGAGAG      |
| pCCA1-b-Rev    | TCCGGGACTACCTGAAAGGTT     |
| pTCP20-CBS-Fw  | AGGGATTAATTTTCTACACATTGT  |
| pTCP20-CBS-Rev | GGTAACAATCCAATAACAGTTGAT  |
| pTCP22-EE-Fw   | TGAACAACCAACAAATCTCACAC   |
| pTCP22-EE-Rev  | AGACTACGTGATGTGTACTGTTT   |
| pTOC1-EE-Fw    | TTTGTTGATTTTGATATGGAGATGC |
| pTOC1-EE-Rv    | GGTTGTGTTGGATAGTTTGGTTGAG |
| UBC21-Fw       | TTCAAATGGACCGCTCTTATCA    |
| UBC21-Rev      | AAACACCGCCTTCGTAAGGA      |

### **qRT-PCR**

|               |                               |
|---------------|-------------------------------|
| UBQ10-ABI-Fw  | AGAAGTTCAATGTTTCGTTTCATGTAA   |
| UBQ10-ABI-Rev | GAACGGAAACATAGTAGAACACTTATTCA |
| CCA1-ABI-Fw   | CTGTGTCTGACGAGGGTCGAA         |
| CCA1-ABI-Rev  | ATATGTAAAACCTTTGCGGCAATACCT   |
| TCP20-ABI-Fw  | TGGCGGTGAAGGAGTTTCTAGG        |
| TCP20-ABI-Rev | TTGGCACACCAGAACCAAACCC        |
| TCP22-ABI-Fw  | ATGCTTCCGATGAGCGGTT           |
| TCP22-ABI-Rev | CGTCCTGTCCCAACTGGATAAT        |

---

### Supplementary Table 3

Search ranges for parameters

| Parameters                                             | Range   | Units                      | Search scale |
|--------------------------------------------------------|---------|----------------------------|--------------|
| $\gamma_{cca}, \gamma_{pr}, \gamma_{toc}$ <sup>1</sup> | 0.01–10 | 1/h                        | Logarithm    |
| $\alpha_{pr1}, \alpha_{cca1}$ <sup>2</sup>             | 0–1     | Dimensionless              | Linear       |
| $\kappa$ 's (in all Hill functions)                    | 0.001–1 | Dimensionless <sup>1</sup> | Logarithm    |

<sup>1</sup>  $\beta$ 's are set to the same value as the corresponding  $\gamma$ 's for a dimensionless unit for the concentration of each gene and for a reduction in number of parameters.

<sup>2</sup> Without loss of generality, we set  $\alpha_{pr2} = 1 - \alpha_{pr1}$  (both models) and  $\alpha_{cca2} = 1 - \alpha_{cca1}$  (Model II).

### Supplementary Table 4

The obtained parameters used in equations (12) and (14)

| Model                                                  | Parameters                 | Value | Dimension     |
|--------------------------------------------------------|----------------------------|-------|---------------|
| I<br>(LWD1 activates <i>PRR9</i> )                     | $n_{basal}$                | 0.3   | 1/h           |
|                                                        | $n_{lwd}$                  | 0.25  | 1/h           |
|                                                        | $\kappa_{lwd}$             | 0.112 | Dimensionless |
| II<br>(LWD1 activates <i>PRR9</i> and<br><i>CCAI</i> ) | <i>PRR9</i> $n_{basal}$    | 0.3   | 1/h           |
|                                                        | <i>PRR9</i> $n_{lwd}$      | 0.25  | 1/h           |
|                                                        | <i>PRR9</i> $\kappa_{lwd}$ | 0.112 | Dimensionless |
|                                                        | <i>CCAI</i> $n_{basal}$    | 0.45  | 1/h           |
|                                                        | <i>CCAI</i> $n_{lwd}$      | 4.5   | 1/h           |
|                                                        | <i>CCAI</i> $\kappa_{lwd}$ | 0.088 | Dimensionless |

## 1 **Supplementary Note 1**

### 2 **Mathematical circuit constructions**

3 The operation of the *Arabidopsis* circadian clock was simulated by the inclusion  
4 of LWD1 while simplifying the core clock components. *CCA1* and *LHY* genes have a  
5 similar expression profile and similar functions<sup>1</sup>, so only *CCA1* was considered in our  
6 model. *PRR9* and *PRR7* function similarly but consecutively in repressing *CCA1* and  
7 *LHY* expression during the day<sup>2,3</sup>. Here, we considered only *PRR9* in the model  
8 settings. Since LWD1 showed no significant oscillation (Supplementary Fig. 12), it is  
9 treated as a constant input in this simulation. We have validated that this  
10 simplification does not alter the insight we obtained when our findings were  
11 integrated into a more complex model<sup>4</sup> and yielded results comparable to the previous  
12 report (Supplementary Fig. 1).

13

#### 14 **Model I: LWD1 regulates the circadian clock via activating only *PRR9***

15 Model I is described as a set of three ordinary differential equations (ODEs)  
16 [equations (1) to (3)].

$$17 \frac{d[cca]}{dt} = (\alpha_{cca1}\beta_{cca})Hill_{rep\_prrs}Hill_{rep\_toc} + (\alpha_{cca2}\beta_{cca})L \cdot cP - (\mu_{cca1}\gamma_{cca} + \mu_{cca2}\gamma_{cca}L)[cca] \quad (1)$$

$$18 \frac{d[prr]}{dt} = (\alpha_{prr1}\beta_{prr} + \alpha_{prr2}\beta_{prr}Hill_{act\_lwd}) \cdot Hill_{act\_cca} + (\alpha_{prr3}\beta_{prr})L \cdot cP \\ - (\mu_{prr1}\gamma_{prr} + \mu_{prr2}\gamma_{prr}D)[prr] \quad (2)$$

$$19 \frac{d[toc]}{dt} = \beta_{toc}Hill_{rep\_cca} - \gamma_{toc}[toc] \quad (3)$$

20 Here,  $[cca]$ ,  $[prr]$ , and  $[toc]$  denote a dimensionless concentration of *CCA1*, *PRR9*,  
21 and *TOC1*, respectively. In equations (1) to (3),  $\beta_x$  denotes the total production rate for  
22 gene  $X$ , and  $\gamma_x$  is for the total degradation rates.  $\alpha$ 's and  $\mu$ 's are dimensionless  
23 fractions of total rates from different regulation sources. For example,  $\mu_{cca1}$  and  $\mu_{cca2}$   
24 are the fraction for the basal degradation and the additional degradation in the light  
25 condition for *CCA1*.  $L$  represents the light function ( $L = 1$  when light is present and  $L$   
26  $= 0$  otherwise) and  $D$  represents darkness ( $D = 1 - L$ ). *CCA1* and *PRR9* rapidly  
27 accumulate in response to light<sup>5,6</sup>. Here, we followed previous work<sup>4,7,8</sup> and modeled  
28 this acute light response by using a light-sensitive activator protein *cP*. The expression

29 of this hypothetical protein accumulates in the dark and degrades in the light.  $Hill_{act}$   
 30 and  $Hill_{rep}$  are the Hill input functions for an activator and a repressor, respectively:

$$31 \quad Hill_{rep} = \frac{\kappa^n}{\kappa^n + [repressor]^n} \quad (4)$$

$$32 \quad Hill_{act} = \frac{[activator]^n}{\kappa^n + [activator]^n} \quad (5)$$

33 where  $\kappa$  represents the threshold of activator or repressor and  $n$  the Hill coefficient  
 34 that governs the steepness of the input function. The larger the  $n$ , the more step-like it  
 35 is in the input functions.

36 In the present work, only the free-running condition under constant light is  
 37 simulated. With  $L = 1$ ,  $D = 0$ , and  $cP$  approaches zero after a long time of constant  
 38 light<sup>4, 7, 8</sup>, equations (1) to (3) can be simplified as equations (6) to (8), in which we  
 39 have omitted unnecessary fractions such as  $\mu_{cca1}$  and  $\mu_{cca2}$ .

$$40 \quad \frac{d[cca]}{dt} = \beta_{cca} Hill_{rep\_prrs} Hill_{rep\_toc} - \gamma_{cca} [cca] \quad (6)$$

$$41 \quad \frac{d[prrr]}{dt} = (\alpha_{prr1} \beta_{prrr} + \alpha_{prr2} \beta_{prrr} Hill_{act\_lwd}) \cdot Hill_{act\_cca} - \gamma_{prrr} [prrr] \quad (7)$$

$$42 \quad \frac{d[toc]}{dt} = \beta_{toc} Hill_{rep\_cca} - \gamma_{toc} [toc] \quad (8)$$

43 We further reduced the parameter space by fixing the value of maximum  
 44 steady-state concentration of each component to unity and turning it into a  
 45 dimensionless quantity; in this way, the maximum production rates ( $\beta$ 's) and total  
 46 degradation rates ( $\gamma$ 's) are set to be equal. The time  $t$  in this model is in the unit of  
 47 hours, achieved by re-scaling all the time-related parameters so that the period of  
 48 oscillation in wild type becomes 24 h.

49 All of the 9 independent parameters were obtained by random search, propagated,  
 50 and screened for regular oscillation, except for the Hill coefficients ( $n$ ) which are  
 51 fixed at 3; the search was performed at a logarithmic scale across three orders of  
 52 magnitude, for  $\gamma$ 's and  $\kappa$ 's, and a linear scale for  $\alpha$ 's. Each parameter was varied  
 53 with their minimum or maximum values as shown in Supplementary Table 3. The  
 54 criteria we used were as follows:

55 (1) The trajectory must oscillate regularly, which was defined by examining the

56 period and amplitude change in each cycle. We calculated the relative  
 57 difference of period and amplitude change for each cycle, defined as  
 58  $|(x1-x2)|/\min(x1, x2)$ , where  $x1$  and  $x2$  are the period or amplitude calculated  
 59 from two consecutive cycles. An acceptable regular oscillation has less than  
 60 5% relative change for more than 10 cycles.

61 (2) In the *lwd1 lwd2* mutant, the oscillation must have reduced amplitude (>50%)  
 62 and shorter period (<21 h), as reported previously<sup>9</sup>.

63 (3) To avoid nonphysical sensitivities to small changes in the simulation, the  
 64 parameter set must generate similar results from two different ODE solvers  
 65 (ODE15s and ODE23s).

66

## 67 **Model II: LWD1 regulates the circadian clock by activating both *PRR9* and** 68 ***CCA1***

69 In this model, equation (1) is modified as equation (9) for light/dark cycling or  
 70 further as equation (10) for constant light, whereas the other two equations remain the  
 71 same. There are two additional parameters ( $\alpha_{cca1}$  and the corresponding  $\kappa$  value in  
 72 the new Hill function  $Hill_{act\_lwd}$  for *CCA1*) in this model. The parameters were  
 73 screened similarly to Model I.

74

$$75 \frac{d[cca]}{dt} = (\alpha_{cca1}\beta_{cca} + \alpha_{cca2}\beta_{cca}Hill_{act\_lwd})Hill_{rep\_prrs}Hill_{rep\_toc} + (\alpha_{cca3}\beta_{cca})L \cdot cP_{fun} - (\mu_{cca1}\gamma_{cca} + \mu_{cca2}\gamma_{cca}L)[cca] \quad (9)$$

$$76 \frac{d[cca]}{dt} = (\alpha_{cca1}\beta_{cca} + \alpha_{cca2}\beta_{cca}Hill_{act\_lwd})Hill_{rep\_prrs}Hill_{rep\_toc} - \gamma_{cca}[cca] \quad (10)$$

## 77 **Genetic perturbation test**

78 The genetic perturbation test involved changing their total production rate ( $\beta$ )  
 79 while keeping the same total degradation rate ( $\gamma$ ). Here, we systematically scanned for  
 80 the fraction of production rate for each gene (from 0 to 1, with 0.01 increment), where  
 81 “0” represents the null mutant condition and “1” the wild-type condition for each  
 82 parameter set. Depending on the parameter sets selected, a different period estimation  
 83 is produced (longer/shorter than 24 h). In addition, each parameter set may have a  
 84 different sensitivity to genetic perturbation; thus some parameter sets can still oscillate  
 85 under strong genetic perturbation and others cannot.



86 For the genetic perturbation tests shown in Fig. 1a, we applied the strongest  
 87 genetic perturbation level while keeping at least two-third of the parameter sets  
 88 obtained previously that can oscillate regularly under this perturbation. For Model I,  
 89 the genetic perturbation levels are 0.92 for *toc1* (with 18 parameter sets), 0.83 for *prp9*  
 90 (with 19 parameter sets), and 0.47 for *cca1* (with 18 parameter sets). For Model II, the  
 91 genetic perturbation levels are 0.68 for *toc1* (with 695 parameter sets), 0.77 for *prp9*  
 92 (with 872 parameter sets), and 0.51 for *cca1* (with 769 parameter sets).

93

#### 94 **Comparison with the Pokhilko model**

95 The latest published model by Pokhilko et al., in 2012<sup>4</sup> (hereafter the Pokhilko  
 96 model), was modified to test the activator role of LWD1 by keeping most parameters  
 97 the same as they were originally described. First, we treated LWD1 as an activator of  
 98 *PRR9* for testing whether this activation was already sufficient to generate previous  
 99 observations. We incorporated LWD1 into the Pokhilko model by changing *PRR9*  
 100 from equation (11) to equation (12). Here, the parameters  $n_4$  and  $n_7$  were  
 101 removed/replaced because the LWD1 effect was likely indirectly included. Since we  
 102 want to explicitly explain the LWD1 activation, we added three additional parameters  
 103 ( $n_{basal}$ ,  $n_{lwd}$ , and  $\kappa_{lwd}$ ) for describing LWD1 activation to *PRR9*.

$$104 \quad \frac{dC_{p9}^m}{dt} = L.q_3.C_p + \frac{g_8}{g_8 + C_{EC}} \left( n_4 + n_7 \cdot \frac{C_L^e}{g_9^e + C_L^e} \right) - m_{12}C_{p9}^m \quad (11)$$

$$105 \quad \frac{dC_{p9}^m}{dt} = L.q_3.C_p + \left( n_{basal} + n_{lwd} \frac{lwd^2}{lwd^2 + K_{lwd}^2} \right) \frac{g_8}{g_8 + C_{EC}} \cdot \frac{C_L^e}{g_9^e + C_L^e} - m_{12}C_{p9}^m \quad (12)$$

106 The Hill coefficient was fixed as 2, following that used in the Pokhilko model. Next, a  
 107 random search was performed to obtain the three additional parameters. The search  
 108 involved the same range as used previously (Supplementary Table 3), with some  
 109 minor manual adjustment. The obtained parameters (Supplementary Table 4) were  
 110 tested to replicate the expression of several clock genes under the *lwd1 lwd2* mutant  
 111 condition (Supplementary Fig. 1a).

112 Next, we tried to modify the Pokhilko model again so that LWD1 activates  
 113 both *CCA1* and *PRR9* genes. Therefore, in addition to equation (12) above, we also  
 114 needed to modify the equation for *CCA1* mRNA. In the Pokhilko model, *CCA1*  
 115 mRNA was represented as equation (13). Then, equation (13) was modified to

116 equation (14). Here, we removed parameter  $n_1$  and replaced it with three additional  
 117 parameters to facilitate the LWD1 activation to *CCA1*. The additional parameters  
 118 were searched as described for equation (12) (Supplementary Table 4). Both  
 119 equations (12) and (14) were used to describe *CCA1* and *PRR9* mRNA  
 120 (Supplementary Fig. 1b).

$$121 \quad \frac{dC_L^m}{dt} = L \cdot q_1 \cdot C_p + n_1 \frac{g_1^a}{g_1^a + (C_{p9} + C_{p7} + C_{NI} + C_T)^a} - (m_1 L + m_2 D) C_L^m \quad (13)$$

$$122 \quad \frac{dC_L^m}{dt} = L \cdot q_1 \cdot C_p + \left( n_{basal} + n_{lwd} \frac{lwd^2}{lwd^2 + K_{lwd}^2} \right) \frac{g_1^a}{g_1^a + (C_{p9} + C_{p7} + C_{NI} + C_T)^a} - (m_1 L + m_2 D) C_L^m \quad (14)$$

123

#### 124 **Supplementary References**

- 125 1. Mizoguchi T, *et al.* LHY and CCA1 are partially redundant genes required to  
 126 maintain circadian rhythms in Arabidopsis. *Developmental cell* **2**, 629-641  
 127 (2002).
- 128
- 129 2. Matsushika A, Makino S, Kojima M, Mizuno T. Circadian waves of  
 130 expression of the APRR1/TOC1 family of pseudo-response regulators in  
 131 Arabidopsis thaliana: insight into the plant circadian clock. *Plant & cell*  
 132 *physiology* **41**, 1002-1012 (2000).
- 133
- 134 3. Makino S, Matsushika A, Kojima M, Oda Y, Mizuno T. Light response of the  
 135 circadian waves of the APRR1/TOC1 quintet: when does the quintet start  
 136 singing rhythmically in Arabidopsis? *Plant & cell physiology* **42**, 334-339  
 137 (2001).
- 138
- 139 4. Pokhilko A, Fernandez AP, Edwards KD, Southern MM, Halliday KJ, Millar  
 140 AJ. The clock gene circuit in Arabidopsis includes a repressilator with  
 141 additional feedback loops. *Molecular systems biology* **8**, 574 (2012).
- 142
- 143 5. Kim JY, Song HR, Taylor BL, Carre IA. Light-regulated translation mediates  
 144 gated induction of the Arabidopsis clock protein LHY. *The EMBO journal* **22**,  
 145 935-944 (2003).
- 146
- 147 6. Ito S, Nakamichi N, Matsushika A, Fujimori T, Yamashino T, Mizuno T.  
 148 Molecular dissection of the promoter of the light-induced and  
 149 circadian-controlled APRR9 gene encoding a clock-associated component of  
 150 Arabidopsis thaliana. *Bioscience, biotechnology, and biochemistry* **69**,  
 151 382-390 (2005).
- 152

- 153 7. Locke JC, *et al.* Extension of a genetic network model by iterative  
154 experimentation and mathematical analysis. *Molecular systems biology* **1**,  
155 2005 0013 (2005).  
156
- 157 8. Pokhilko A, *et al.* Data assimilation constrains new connections and  
158 components in a complex, eukaryotic circadian clock model. *Molecular*  
159 *systems biology* **6**, 416 (2010).  
160
- 161 9. Wang Y, Wu JF, Nakamichi N, Sakakibara H, Nam HG, Wu SH.  
162 LIGHT-REGULATED WD1 and PSEUDO-RESPONSE REGULATOR9  
163 form a positive feedback regulatory loop in the Arabidopsis circadian clock.  
164 *The Plant cell* **23**, 486-498 (2011).  
165
